## Methylthioadenosine reduces host inflammatory response by suppressing *Salmonella* virulence

Running title (54 char max): Methylthioadenosine suppresses *Salmonella* virulence

5 Jeffrey S. Bourgeois<sup>a,b</sup>, Daoguo Zhou<sup>c</sup>, Teresa L. M. Thurston<sup>d</sup>, James J. Gilchrist<sup>e,ff</sup>, Dennis C. Ko<sup>a,b,g#</sup>

### Affiliations

<sup>a</sup>Department of Molecular Genetics and Microbiology, School of Medicine, Duke University,  
10 Durham, NC, USA

<sup>b</sup>University Program in Genetics and Genomics, Duke University, Durham, NC, USA

<sup>c</sup>Department of Biological Sciences, Purdue University, West Lafayette, IN, USA

<sup>d</sup>Section of Microbiology, Centre for Molecular Microbiology and Infection, Imperial College  
London, Armstrong Road, London, UK

15 <sup>e</sup>Wellcome Trust Centre for Human Genetics, Roosevelt Drive, University of Oxford, Oxford,  
UK

<sup>f</sup> Department of Paediatrics, University of Oxford, Oxford, UK

<sup>g</sup>Division of Infectious Diseases, Department of Medicine, School of Medicine, Duke University,  
Durham, NC, USA

20

JJG and DCK contributed equally to this work

#Address correspondence to [dennis.ko@duke.edu](mailto:dennis.ko@duke.edu) or [james.gilchrist@paediatrics.ox.ac.uk](mailto:james.gilchrist@paediatrics.ox.ac.uk)

Abstract: 215 words, Significance: 94 words. Full Text: 5020 words

25

## **Abstract**

In order to deploy virulence factors at appropriate times and locations, microbes must rapidly sense and respond to various metabolite signals. Previously we showed transient elevation of the methionine-derived metabolite methylthioadenosine (MTA) in serum during systemic

30 *Salmonella enterica* serovar Typhimurium (*S. Typhimurium*) infection. Here we explored the functional consequences of increased MTA concentrations on *S. Typhimurium* virulence. We found that MTA—but not other related metabolites involved in polyamine synthesis and methionine salvage—reduced motility, host cell pyroptosis, and cellular invasion. Further, we developed a genetic model of increased bacterial endogenous MTA production by knocking out

35 the master repressor of the methionine regulon, *metJ*. Like MTA treated *S. Typhimurium*, the  $\Delta metJ$  mutant displayed reduced motility, host cell pyroptosis, and invasion. These phenotypic effects of MTA correlated with suppression of flagellar and *Salmonella* pathogenicity island-1 (SPI-1) networks.  $\Delta metJ$  *S. Typhimurium* had reduced virulence in oral infection of C57BL/6 mice. Finally,  $\Delta metJ$  bacteria induced a less severe inflammatory cytokine response in a mouse

40 sepsis model. These data provide a possible bacterial mechanism for our previous findings that pretreating mice with MTA dampens inflammation and prolongs survival. Together, these data indicate that exposure of *S. Typhimurium* to MTA or disruption of the bacterial methionine metabolism pathway is sufficient to suppress SPI-1 mediated processes, motility, and *in vivo* virulence.

45

## **Significance**

*Salmonella enterica* serovar Typhimurium (*S. Typhimurium*) is a leading cause of gastroenteritis and bacteremia worldwide. Widespread multi-drug resistance, inadequate diagnostics, and the  
50 absence of a vaccine for use in humans, all contribute to the global burden of morbidity and mortality associated with *S. Typhimurium* infection. Here we find that increasing the concentration of the methionine derived metabolite methylthioadenosine, either in *S. Typhimurium* or in its environment, is sufficient to suppress virulence processes. These findings could be leveraged to inform future therapeutic interventions against *S. Typhimurium* aimed at  
55 manipulating either host or pathogen methylthioadenosine production.

## **Introduction**

Microbial communities within a mammalian host are bombarded by an array of intercellular, interspecies, and cross-kingdom metabolites and proteins. Cross-kingdom signaling  
60 plays important roles in *Salmonella* pathogenesis. For instance, in order to invade non-phagocytic host cells, *Salmonella* must deploy a secretion system encoded the *Salmonella* Pathogenicity Island-1 (SPI-1) (1, 2), which is regulated by many signals such as pH, bile, and short chain fatty acids (3-7). Together, these factors spatially limit the bacteria so that most invasion occurs in the ileum (8). Furthermore, recent work demonstrates that a host mimic of the  
65 bacterial AI-2 quorum molecule can directly impact *S. Typhimurium* gene expression *in vitro* by activating the *lsr* operon (9). Understanding how the bacteria's environment influences *Salmonella* pathogenesis is important as it could help to inform future therapeutic interventions to suppress virulence.

One signal that may facilitate cross-talk between host and pathogen during infection is  
70 methylthioadenosine (MTA), a key metabolite in methionine metabolism. In addition to its role  
in protein synthesis, methionine is used in both eukaryotic and prokaryotic systems to generate  
S-Adenosyl methionine (SAM), which is a critical methyl donor for a number of reactions (10,  
11). SAM catabolism results in a number of metabolic byproducts, including MTA and S-  
adenosylhomocysteine (SAH). In many eukaryotic and prokaryotic systems, MTA is recycled  
75 back into methionine, however, *E. coli* and *S. Typhimurium* cannot salvage methionine from  
MTA (12). Instead, *E. coli* and *Salmonella* spp. regulate intracellular MTA concentrations by  
using an MTA/SAH nucleosidase (*pfs*) to cleave MTA into 5'methylthioribose and excreting it  
(13, 14). MTA regulation is considered to be critical for the bacterial cell as deletion of *pfs*  
impairs growth (15), but the effects of MTA on *Salmonella* virulence remain unknown.

80 Previously, our lab determined that MTA plays a multifaceted role in *Salmonella*  
infection. We originally identified MTA as a positive regulator of host cell pyroptosis, a rapid,  
proinflammatory form of cell death, during *Salmonella* infection (16). More recently, we showed  
that host MTA is released into plasma during *S. Typhimurium* infection, and that high plasma  
MTA levels are associated with poor sepsis outcomes in humans (17). Paradoxically, we showed  
85 that exogenous treatment with MTA suppressed sepsis-associated cytokines and extended the  
lifespan of mice infected with a lethal dose of *S. Typhimurium* (17). While consistent with  
previous reports that MTA acts as an anti-inflammatory molecule (18-20), this was in contrast to  
our findings that MTA primes cells to undergo pyroptosis. Together, these data led us to  
hypothesize that increased extracellular concentrations of MTA could potentially have  
90 independent effects on both the host and pathogen during infection.

Here we show that fluctuations in MTA levels regulate *S. Typhimurium* virulence *in vitro* and *in vivo*. Treatment of *S. Typhimurium* with exogenous MTA prior to infection or increasing endogenous bacterial production of MTA through genetic deletion of the methionine regulon suppressor, *metJ*, reduced the induction of pyroptosis and invasion *in vitro*. Furthermore, we report that both  $\Delta metJ$  mutants and MTA treated bacteria demonstrate transcriptional, translational, and functional reductions in SPI-1 activity and motility. Finally, we find that  $\Delta metJ$  mutants have reduced virulence *in vivo* and that disrupting the methionine metabolism pathway in the bacteria can influence the inflammatory state of the host. Together, these data reveal the importance of MTA and bacterial methionine metabolism for regulating *S. Typhimurium* virulence and host inflammation, and provide a possible example of host-pathogen metabolite cross-talk during infection.

## **Results**

**Exogenous MTA reduces the ability for *S. Typhimurium* to induce pyroptosis and invade host cells *in vitro*.**

Previously, we demonstrated elevated concentrations of MTA in plasma during systemic infection of mice with *S. Typhimurium* (17). While effects of MTA on the host inflammatory response have been documented (16-20), we asked whether elevated extracellular MTA could directly impact bacterial virulence. We examined the ability for *S. Typhimurium* pretreated with MTA (300  $\mu$ M) to induce pyroptosis and invade human cells. As our original studies that identified MTA as a modulator of pyroptosis were performed in lymphoblastoid cells (LCLs), and because B cells are a natural target of *S. Typhimurium* invasion *in vivo* (21-23), we first looked for an effect of exogenous MTA in LCLs. We assessed both pyroptosis and invasion by

pairing a modified gentamicin protection assay with flow cytometry, as previously described  
115 (24) (Figure 1A). Briefly, pyroptosis was measured by quantifying the number of cells that  
stained positive for 7AAD three hours post infection with *S. Typhimurium*. Independently,  
cellular invasion was quantified by using bacteria with a GFP plasmid, inducing GFP production  
after gentamicin treatment, and quantifying the number of GFP-positive host cells three hours  
post infection. MTA pretreatment had no effect on bacteria growth from the initial overnight  
120 culture dilution through late-log phase to induce SPI-1 gene expression (Figure 1B). MTA  
pretreated bacteria displayed a 30% decrease ( $p=0.0001$ ) in their ability to induce pyroptosis  
(Figure 1C). Furthermore we observed a 35% decrease ( $p=0.007$ ) in their ability to invade LCLs  
(Figure 1C). We observed similar effects of MTA on pyroptosis and invasion in THP-1  
monocytes (Figure 1D). This was in contrast to our previous finding that MTA treatment of host  
125 cells primes them to undergo higher levels of pyroptosis upon *S. Typhimurium* infection (16),  
and suggests that the molecule has separate effects on both the host and pathogen.

This reduction in pyroptosis could not be reproduced by treating the bacteria with other  
metabolites related to the mammalian methionine salvage pathway, including methionine, SAM  
(also known as AdoMet),  $\alpha$ -Keto- $\gamma$ -(methylthio)butyric acid (MTOB), and phenylalanine (Figure  
130 1E, F). Similarly, adenosine (which is only lacking the methylthio group of MTA) was not  
sufficient to suppress pyroptosis induction. In fact, adenosine increased pyroptosis in both LCLs  
and THP-1s. Of note, the bacterial cell is reportedly impervious to SAM (25, 26), so we cannot  
rule out that high intracellular concentrations of the molecule could suppress pyroptosis,  
however, our results rule out the molecule as an external signal regulating pyroptosis. Thus,  
135 these data demonstrate that MTA exposure uniquely suppresses the ability of *S. Typhimurium* to  
induce pyroptosis and invade host cells.

### ***metJ* deletion in *S. Typhimurium* elevates levels of MTA**

In order to provide independent evidence for MTA-mediated regulation of *Salmonella* virulence, we genetically disrupted the *S. Typhimurium* methionine metabolism pathway. The protein MetJ is the master repressor of the methionine regulon and transcriptionally blocks multiple enzymatic steps that enable the generation of methionine and SAM (Figure 2A) (10). We hypothesized that deletion of *metJ* would relieve this transcriptional suppression and result in elevated intracellular MTA levels. Therefore, we generated a  $\Delta metJ$  mutant and performed mass spectrometry to examine how metabolites in the methionine metabolism pathway were impacted by the mutation. In line with previous reports, we observed an increase in methionine levels in the  $\Delta metJ$  mutant (27) (Figure 2B). MTA, SAM, and phenylalanine were also increased (Figure 2C, D, E). Expressing *metJ* from a plasmid could reverse these increases. Consistent with MTA being an inhibitor of polyamine synthesis, the polyamine spermine was decreased in the  $\Delta metJ$  mutant, while no change was observed in another polyamine, spermidine (Figure 2F, G). Disrupting the methionine metabolism pathway by deleting *metJ* did not affect bacterial growth (Figure 2H).

### **Elevated endogenous MTA suppresses pyroptosis and invasion *in vitro***

After demonstrating that *metJ* deletion leads to the accumulation of MTA in the bacterial cell, we examined whether critical *Salmonella* virulence processes are suppressed in the  $\Delta metJ$  mutant. Similar to *S. Typhimurium* treated with MTA,  $\Delta metJ$  had a reduced ability to induce pyroptosis in LCLs and THP-1 monocytes (Figure 3A, B). Importantly, MTA was the only measured elevated metabolite in the  $\Delta metJ$  mutant that inhibited levels of pyroptosis when added

160 exogenously to wild-type bacteria (see Figure 1D). This reduction in pyroptosis was rescued by  
expressing *metJ* from a plasmid.  $\Delta metJ$  *S. Typhimurium* had reduced invasion of LCLs, THP-1  
monocytes, and HeLa cells (Figure 3A, B, C). Spermine and other polyamines could not rescue  
pyroptosis induced by  $\Delta metJ$  *S. Typhimurium*, suggesting these findings are not mediated by the  
reduction in spermine we observe in the  $\Delta metJ$  mutant (Figure 3D, E).

165 Motility and the SPI-1 type III secretion system (T3SS) are critical processes for the  
induction of pyroptosis and *S. Typhimurium* invasion *in vitro*. Motility increases the frequency  
by which interactions between host and *S. Typhimurium* cells occur and enables bacterial  
scanning of the host cell surface to optimize invasion (28, 29). The SPI-1 secretion system not  
only enables the transport of effector proteins into the host cell that enable invasion (1, 2), but  
170 also acts as a trigger for pyroptosis in human cells (30-34). Therefore, our observation that both  
pyroptosis and invasion are suppressed in MTA-treated and  $\Delta metJ$  *S. Typhimurium* led us to  
hypothesize that motility and/or SPI-1 are suppressed in response to increased concentrations of  
MTA.

## 175 **Disruption of methionine metabolism and treatment with exogenous MTA impairs *S.* *Typhimurium* motility**

In order to determine whether motility was impaired in the  $\Delta metJ$  mutant, we performed  
a standard bacterial soft agar motility assay (35) and found that  $\Delta metJ$  was only able to traverse  
two thirds the distance of the wild-type bacteria over six hours (Figure 4A). This motility defect  
180 was restored by expression of *metJ* from a plasmid. In order to confirm that increased MTA  
levels were sufficient to drive this phenotype, we also examined *S. Typhimurium* motility on soft  
agar containing 300 $\mu$ M MTA. Like  $\Delta metJ$ , wild-type bacteria swimming on MTA containing



agar demonstrated approximately two thirds the motility of those on DMSO (Figure 4B). To further characterize this motility defect, we examined expression of key motility regulators by qPCR in the  $\Delta metJ$  mutant. While the master regulator to the flagellar regulon, *flhD*, did not show reduced expression, two class two flagellar genes, *fliA* and *fliZ*, showed significant downregulation, which correlates with the decrease in motility (Figure 4C). Together, these data revealed that MTA suppresses the *S. Typhimurium* flagellar regulon downstream of *flhD* transcription, resulting in impaired motility *in vitro*.

190

### **Elevated endogenous MTA suppresses expression of SPI-1 encoded genes**

Deploying the SPI-1 encoded T3SS depends on a complex regulatory network in which HilD, HilC, and RtsA drive expression of *hilA* (36, 37). HilA then enables the expression of the *inv/spa* and *prg/org* operons (38-40). Both HilD and HilA directly promote the expression of the first gene in the *inv/spa* operon, *invF* (41), which is then able to drive the expression of the *sic/sip* operon and a number of other critical effectors (39, 42, 43).

Three lines of evidence demonstrated suppression of SPI-1 by MTA. First, we observed suppression of SPI-1 encoded genes in  $\Delta metJ$  *S. Typhimurium* by qPCR. In particular, we saw a decrease in *invF* expression, as well as the translocon component *sipB*. The finding that *sipB* is significantly suppressed is of note, as SipB is involved in induction of pyroptosis by *S. Typhimurium* (33). Further, while not statistically significant when taking into account multiple-test correction, we saw comparable changes trending towards significance in the regulatory factor *rtsA*, the chaperone protein *sicP*, and the needle complex component *prgH*. (Figure 5A). This suggests that there is at least modest suppression of SPI-1 regulated genes by MTA on the transcriptional level under standard culture conditions. Second, reduced expression of SipA, a

205

SPI-1 secreted effector, was detected in  $\Delta metJ$  cell lysates by western blot staining (Figure 5B). Third, this reduction in SipA was greater in  $\Delta metJ$  cell free supernatants than cell lysates, suggesting that both expression of SipA as well as its secretion by the T3SS apparatus are suppressed in the mutant (Figure 5B). This is consistent with the suppression of *invF* and *sipB* observed by qPCR. These reductions in SipA were also detected in MTA treated *S. Typhimurium* (Figure 5C). Together, these data demonstrate suppression of the SPI-1 network by MTA.

### **Disruption of bacterial methionine metabolism impairs virulence *in vivo***

Induction of inflammation and host cell invasion are critical processes that enable *Salmonellae* to colonize and disseminate from the mouse gut (2, 8, 36, 44-46). Our findings that both the induction of pyroptosis and host cell invasion are attenuated in the  $\Delta metJ$  mutant led us to hypothesize that this mutant also has impaired virulence *in vivo*. To test this, we orally infected C57BL/6J mice with wild-type and  $\Delta metJ$  *S. Typhimurium* and measured the bacteria's ability to infect and disseminate to the spleen. We found that  $\Delta metJ$  had a 30-fold reduction in fitness compared to wild-type *S. Typhimurium* at five days post infection (Figure 6). This supports the hypothesis that *metJ* is important for *S. Typhimurium* to establish an infection in the mammalian gut and disseminate to the spleen.

### **Disruption of methionine metabolism in *S. Typhimurium* reduces inflammatory cytokine production**

We previously reported that treatment of mice with MTA before infecting with a lethal dose of *S. Typhimurium* resulted in reduced production of sepsis-related cytokines (IL-6 and

TNF $\alpha$ ) and modestly prolonged survival (17). We hypothesized that the previously observed  
230 effects on inflammation may be due to MTA's impact on the microbe. This hypothesis is based  
on our findings that *metJ* knockout suppresses murine-detected PAMPs, specifically flagellin  
(47, 48) and the SPI-1 T3SS (34, 49, 50).

To test whether MTA reduces host inflammation by suppressing *S. Typhimurium*  
virulence, we injected mice with a lethal dose ( $1 \times 10^6$  CFUs) of either wild-type or  $\Delta$ *metJ* *S.*  
235 *Typhimurium* by an intraperitoneal route and measured CFUs and cytokines four hours post  
infection. Similar to what we observed with exogenous treatment of the mice with MTA (17), we  
did not see a difference in CFUs, suggesting that both wild-type and  $\Delta$ *metJ* *S. Typhimurium*  
were equally capable of colonizing the spleen at this time point (Figure 7A). In contrast, IL-6  
was 28% lower ( $p=0.03$ ) in mice infected with the  $\Delta$ *metJ* mutant (Figure 7B). Further, TNF $\alpha$   
240 concentrations also showed a similar relative decrease (34%), though that result did not meet  
statistical significance ( $p=0.09$ ). Therefore,  $\Delta$ *metJ* phenocopies the anti-inflammatory effects of  
treating mice with MTA before infection with *S. Typhimurium*, demonstrating that these effects  
of MTA could be mediated not only through effects on the host, but also through suppression of  
*S. Typhimurium* pro-inflammatory virulence gene expression.

245

## **Discussion**

Here we report that exposing *S. Typhimurium* to exogenous MTA or increasing  
endogenous MTA production suppresses virulence *in vitro* and *in vivo*. These phenotypes  
correlate with transcriptional, translational, and functional suppression of the flagellar regulon  
250 and SPI-1. This adds to a growing body of literature demonstrating that environmental factors in  
the host can regulate critical *Salmonella* virulence factors (3-7, 51, 52). We hypothesize that this

represents an example of host-pathogen cross-talk, in which the host suppresses *Salmonella* virulence by increasing MTA concentrations. This would represent a novel antimicrobial mechanism, and is supported by our findings that MTA plasma concentrations increase during  
255 infection (17). Future studies could benefit from examining MTA concentrations in the gut, as modulation of MTA there could directly promote or impair SPI-1 function. If MTA were increased in the gut during infection, as we observed in plasma, this could result in suppression of SPI-1 and bacterial invasion. Alternatively, if MTA were present at lower levels in the ileum relative to the rest of the gut, this could serve as a signal to turn on expression of the SPI-1 T3SS.  
260 Our future studies will investigate if and how MTA functions as a cross-kingdom signal during *Salmonella* infection and how methionine metabolism can be therapeutically targeted.

While no previous work examined the impact of *metJ* deletion on *S. Typhimurium* virulence, two papers reported effects of  $\Delta metJ$  and virulence in other bacterial pathogens. Bogard *et al.* report that  $\Delta metJ$  suppresses *Vibrio cholerae* virulence *in vivo* (53). Conversely,  
265 Cubitt *et al.* demonstrated that  $\Delta metJ$  increased the production of quorum sensing molecules and expression of virulence genes in the potato pathogen *Pectobacterium atrosepticum* (54). However, in both these cases, the metabolic changes responsible for these phenotypes are unknown. We hypothesize that our discovery of the role of *metJ* in regulating intracellular MTA concentrations could help explain these findings. If exogenous MTA can drive these phenotypes,  
270 similar to what we report here in *S. Typhimurium*, it would suggest that modulation of MTA concentrations represents a mechanism by which virulence can be manipulated across multiple bacterial species.

One mechanism by which MTA may influence the *S. Typhimurium* flagellar regulon and SPI-1 encoded genes is by altering methylation. In prokaryotic and eukaryotic systems, SAM

275 provides the methyl for a variety of DNA, RNA, and protein methylation reactions (55-60). In  
eukaryotic systems, modulation of methionine metabolism resulting in changes to the cellular  
MTA and SAM pools can have important consequences on protein, DNA, and RNA methylation  
(61-64). Therefore, we hypothesize that increased MTA leads to altered methylation of critical  
SPI-1 and flagellar regulators, resulting in their suppression. This could be part of a metabolic  
280 stress response, as both SPI-1 secretion and swimming motility are energetically expensive  
processes that the bacteria may downregulate in response to methionine metabolism  
dysregulation (65). Understanding how MTA is sensed, what process it regulates directly, and  
how this process influences virulence could help understand this novel example of host-pathogen  
communication and further inform future therapeutics targeting this process.

285 Since exogenous and endogenous MTA affects *Salmonella* virulence, both bacterial and  
host methionine metabolism present therapeutic targets. Previous studies tested MTA  
nucleosidase inhibitors against bacterial pathogens based on the assumption that disrupting MTA  
nucleosidase would lead to an MTA accumulation, resulting in an arrest of cellular growth and  
reduced bacterial viability (66-68). However, MTA nucleoside inhibitors showed, at most,  
290 modest bacteriostatic potential in these studies. In contrast, studies examining the effects of these  
compounds on quorum sensing also showed no changes in bacterial growth, but did identify  
suppression of AI-2 synthesis (69, 70). This is in line with our observation that *Salmonella*  
growth is not impaired by increased concentrations of MTA in the  $\Delta metJ$  mutant, but that there  
are functional consequences on virulence. However, no study has examined the potential of these  
295 compounds to directly impact virulence, independent of growth. Our data suggest that these  
compounds likely have antibacterial properties, because their disruption of methionine  
metabolism *in vivo* impairs virulence. Furthermore, other groups have developed S-methyl-5'-

thioadenosine phosphorylase (MTAP) inhibitors, which block mammalian MTA catabolism (71-73), increasing MTA concentrations in tissues, plasma, and urine in murine models (74). Based on these results and our demonstration that high extracellular MTA suppresses virulence, we hypothesize that MTAP inhibitors could be a host-directed therapy during *Salmonella* infection. Therefore, the findings described here suggest that MTA nucleosidase inhibitors and MTAP inhibitors could be harnessed to combat bacterial infections and improve clinical outcomes.

## Materials and Methods

### Mammalian cells and bacterial strains

HapMap LCLs were purchased from the Coriell Institute. LCLs and THP-1 monocytes were cultured at 37°C in 5% CO<sub>2</sub> in RPMI 1650 media (Invitrogen) supplemented with 10% FBS, 2 µM glutamine, 100 U/mL penicillin-G, and 100 mg/mL streptomycin. HeLa cells were grown in DMEM media supplemented with 10% FBS, 1mM glutamine, 100 U/mL penicillin-G, and 100mg/mL streptomycin. Cells used for *Salmonella* gentamicin protection assays were grown in antibiotic free media one hour prior to infection.

All *Salmonella* strains are derived from the *S. Typhimurium* NCTC 12023 (ATCC 14028) strain and are listed in Table 1. All knockout strains were generated by lambda red recombination (75). Recombination events were verified by PCR, and the pCP20 plasmid was used to remove the antibiotic resistant cassette after recombination (76). Strains were cultured overnight in LB broth (Miller) overnight, subcultured 1:33, and grown for two hours and forty minutes shaking at 37°C before all experiments unless otherwise noted. Strains containing the temperature sensitive plasmids pKD46 or pCP20 were cultured at 30°C and removed at 42°C. Ampicillin was added to LB at 50µg/mL, kanamycin at 20µg/mL, and tetracycline at 12µg/mL.

Exogenous metabolites (5'-Deoxy-5'-(methylthio)adenosine, L-Phenylalanine, L-Methionine,  $\alpha$ -Keto- $\gamma$ -(methylthio)butyric acid sodium salt, Adenosine, Spermine, Spermidine, Putrescine dihydrochloride: Sigma. S-(5'-Adenosyl)-L-methionine chloride (hydrochloride): Cayman Chemicals) were added to LB during the two hour and forty minute subculture step at 300 $\mu$ M  
325 final concentration unless otherwise noted.

### Gentamicin protection assay

As previously described, inducible GFP plasmids were transformed into *S. Typhimurium* strains in order to assess both *Salmonella*-induced cell death and invasion by flow cytometry  
330 (24). Briefly, bacteria cultures were prepared as described above and used to infect LCLs and THP-1 monocytes (MOI 10 or MOI 30), as well as HeLa cells (MOI 5). At one hour post infection cells were treated with gentamicin (50 $\mu$ g/mL), and IPTG was added 2 hours post infection to induce GFP expression. At 3.5 hours post infection cells were assessed for cell death using either staining with 7-aminoactinomycin D (7-AAD; Biomol) read by a Guava Easycyte  
335 Plus flow cytometer (Millipore). Percent invasion was determined by quantifying the number of GFP+ cells 3.5 hours post infection using the Guava Easycyte Plus flow cytometer.

### Metabolomics

Bacteria were grown overnight as described above and subcultured 1:33 in 10mL LB and  
340 grown for 2 hours and 40 minutes. After thorough washing in PBS, samples were flash frozen, thawed, and 0.5 mL PBS was added directly onto the pellets. Samples were then transferred to 2 mL CK01 bacterial lysis tubes (Bertin). These were then taken through 3 cycles of 20 second bursts at 7,500 RPM with 30 second pauses in between bursts using a Bertin Precellys (protocol

as recommended by Bertin). Samples were spun at 5,000 for 5 minutes and a Bradford assay was  
345 performed on each lysate to gather protein concentration values. 100  $\mu$ L from each homogenate  
was pipetted directly into a 2 mL 96-well plate (Nunco).

The internal standard methanol solution was made by pipetting 166.7  $\mu$ L of NSK-A  
standard (Cambridge Isotope) at 500  $\mu$ M, 62.5  $\mu$ L of 500 nM of d3-MTA, and 49.771 mL of  
MeOH. 900  $\mu$ L of this internal standard solution in MeOH was pipetted into all of the standard  
350 and sample wells. The plate was then capped and mixed at 700 rpm at 25C for 30 minutes. The  
plate was then centrifuged at 3000 rpm for 10 minutes. Using an Integra Viaflo96 pipettor, 600  
 $\mu$ L of extract was pipetted out and transferred to a new 96-well plate. The extracts were allowed  
to dry under a gentle stream of nitrogen until completely dry. 32  $\mu$ L of 49/50/1  
water/acetonitrile/trifluoroacetic acid was added to each well and mixed at 650 rpm for 10  
355 minutes at room temperature. Then 128  $\mu$ L of 1% trifluoroacetic acid was added to each, mixed  
briefly, and centrifuged down to give a total of 160  $\mu$ L of sample.

The samples were analyzed using Ultraperformance Liquid Chromatography  
/Electrospray Ionization/Tandem Mass Spectrometry (UPLC/ESI/MS/MS) using a customized  
method allowing chromatographic resolution of all analytes in the panel. Flow from the LC  
360 separation was introduced via positive mode electrospray ionization (ESI+) into a Xevo TQ-S  
mass spectrometer (Waters) operating in Multiple Reaction Monitoring (MRM) mode. MRM  
transitions (compound-specific precursor to product ion transitions) for each analyte and internal  
standard were collected over the appropriate retention time. The data were imported into Skyline  
(<https://skyline.gs.washington.edu/>) for peak integration, and exported into Excel for further  
365 calculations.



### Bacterial RNA isolation and qPCR

Bacteria were grown as described above and RNA was isolated from  $5 \times 10^8$  bacteria using the Qiagen RNeasy Protect Bacteria Reagent and RNeasy minikit (Qiagen) according to the manufacturer's instructions. RNA was treated with DNase I (NEB) and 500ng were reverse transcribed using the iScript cDNA synthesis kit (Bio-Rad Laboratories). qPCR was performed using the iTaq Universal SYBR Green Supermix (Bio-Rad Laboratories). 10 $\mu$ L reactions contained 5 $\mu$ L of the supermix, a final concentration of 500nM of each primer, and 2 $\mu$ L of cDNA. Reactions were run on a StepOnePlus Real-Time PCR System (Applied Biosystems). The cycling conditions were as follows: 95°C for 30 seconds, 40 cycles of 95 degrees for 15 seconds and 60°C for 60 seconds, and 60°C for 60 seconds. A melt curve was performed in order to verify single PCR products. The comparative threshold cycle ( $C_T$ ) method was used to quantify transcripts, with the ribosomal *rrs* gene serving as the endogenous control.  $\Delta C_T$  values were calculated by subtracting the  $C_T$  value of the control gene from the target gene, and the  $\Delta\Delta C_T$  was calculated by subtracting the wildtype  $\Delta C_T$  from the mutant  $\Delta C_T$  value. Fold change represents  $2^{-\Delta\Delta C_T}$ . Experiments included three technical replicates and data represent qPCR results from five separate RNA isolation experiments. Oligonucleotides are listed in Table 2.

### Analysis of Bacterial Protein Expression

Bacteria were grown as described above. For analysis of cell lysates, bacterial cultures were centrifuged at 10,000xg for 5 minutes. Supernatant was discarded and pellets were lysed in 2x laemmli buffer (Bio-Rad) with 5% 2-Mercaptoethanol. Samples were boiled for 10 minutes and analyzed on Mini-PROTEAN TGX Stain-Free gels (Bio-Rad). Bands were stained with a rabbit anti-SipA antibody overnight at 4°C. Antibody were then detected by staining with the LI-

390 CORE IRDye 800CW donkey anti-rabbit antibody. SipA was quantified using a LI-CORE  
Odyssey Fc, paired with Image Studio software. Bands were quantified to total protein using the  
TGX stain free system. Total protein was quantified with using Fiji (77).

For secreted protein analysis, cultures were centrifuged at 10,000xg for 5 minutes, and  
supernatants were passed through a .2 $\mu$ m syringe filter. At this point, 6 $\mu$ L of 100ng/ $\mu$ L BSA was  
395 added to 600 $\mu$ L of supernatant as a loading control. Chilled 100% trichloroacetic acid was added  
to a final concentration of 10% and incubated on ice for 10 minutes. 600 $\mu$ L of chilled 10%  
trichloroacetic acid was added, and the solution incubated on ice for another 20 minutes before  
being centrifuged at 20,000xg for 30 minutes. Pellets were washed twice with acetone and  
resuspended in 2x laemmli buffer (Bio-Rad) with 5% 2-Mercaptoethanol before boiling for 10  
400 minutes. Proteins were then analyzed as described above.

### Motility Assay

Motility assay was performed as previously described (35). Briefly, strains were cultured  
overnight in LB broth (Miller), subcultured 1:33, and grown for two hours and forty minutes  
405 shaking at 37°C. 2 $\mu$ L of the subcultured solution was plated in the center of a 0.3% agar LB  
plate supplemented with 50 $\mu$ g/mL ampicillin. Metabolites or DMSO were added to the solution  
prior to the agar solidifying in order to allow exposure of the bacteria to the metabolite for the  
entirety of the assay. Plates were incubated at 37°C for 6 hours before the halo diameter was  
quantified.

410

### Mouse infection studies

Mouse studies were approved by the Duke Institutional Animal Care and Use Committee and adhere to the *Guide for the Care and Use of Laboratory Animals* of the National Institutes of Health. Bacteria were grown as described above, washed, and resuspended in PBS. Inoculums  
415 were confirmed by plating for CFUs. For oral infections, age and sex matched 7-16 week old C57BL/6J mice were fasted for 12 hours before infection. Thirty minutes prior to infection mice received 100 $\mu$ L of a 10% sodium bicarbonate solution by oral gavage. Age and sex matched mice were then infected with  $10^6$  bacteria in 100 $\mu$ L PBS by oral gavage. Five days post infection, mice were euthanized by CO<sub>2</sub> asphyxiation, and spleens were harvested, homogenized,  
420 weighed, and plated on LB agar containing either ampicillin or kanamycin. Competitive index was calculated as ( $\Delta metJ$  CFUs/WT CFUs)/( $\Delta metJ$  CFUs in inoculum/WT CFUs in inoculum). Statistics were calculated by log transforming this ratio from each mouse and comparing to an expected value of 0 using a one-sample t-test.

For high dose intraperitoneal (IP) injection, cultures were grown as described above,  
425 washed, and resuspended in PBS. Inoculums were confirmed by plating for CFUs. Age and sex matched 6-8 week old C57BL/6J mice then received  $10^6$  bacteria in 100 $\mu$ L of PBS by IP injection. Four hours post infection, mice were euthanized by CO<sub>2</sub> asphyxiation, blood was drawn by cardiac puncture, and spleens were harvested, homogenized, weighed, and plated on LB agar containing ampicillin. Plasma was isolated using PST tubes with lithium heparin (BD).  
430 IL-6 and TNF $\alpha$  were then quantified from plasma and spleen extracts using the DuoSet ELISA kits (R&D Systems).

**Acknowledgements.** We thank David W. Holden for providing an intellectual home for JJJ during the formative part of this project and for providing useful discussion of the manuscript.

435 We also thank Kyle Gibbs, Monica Alvarez, Alejandro Antonia, Sarah Jaslow, and Kelly  
Pittman for sharing their expertise and support throughout the project. JSB was supported by  
NIH 5T32GM007754. JSB and DCK were supported by NIH R01AI118903 and Duke MGM  
startup funds. JJG was supported by a Wellcome Trust Clinical PhD Fellowship  
(102342/Z/13/Z). TLMT was supported by an Imperial College Junior Research Fellowship  
440 (RSRO\_P50016). We thank the Duke University School of Medicine for the use of the  
Proteomics and Metabolomics Shared Resource, which provided measurement of MTA and  
related metabolites.

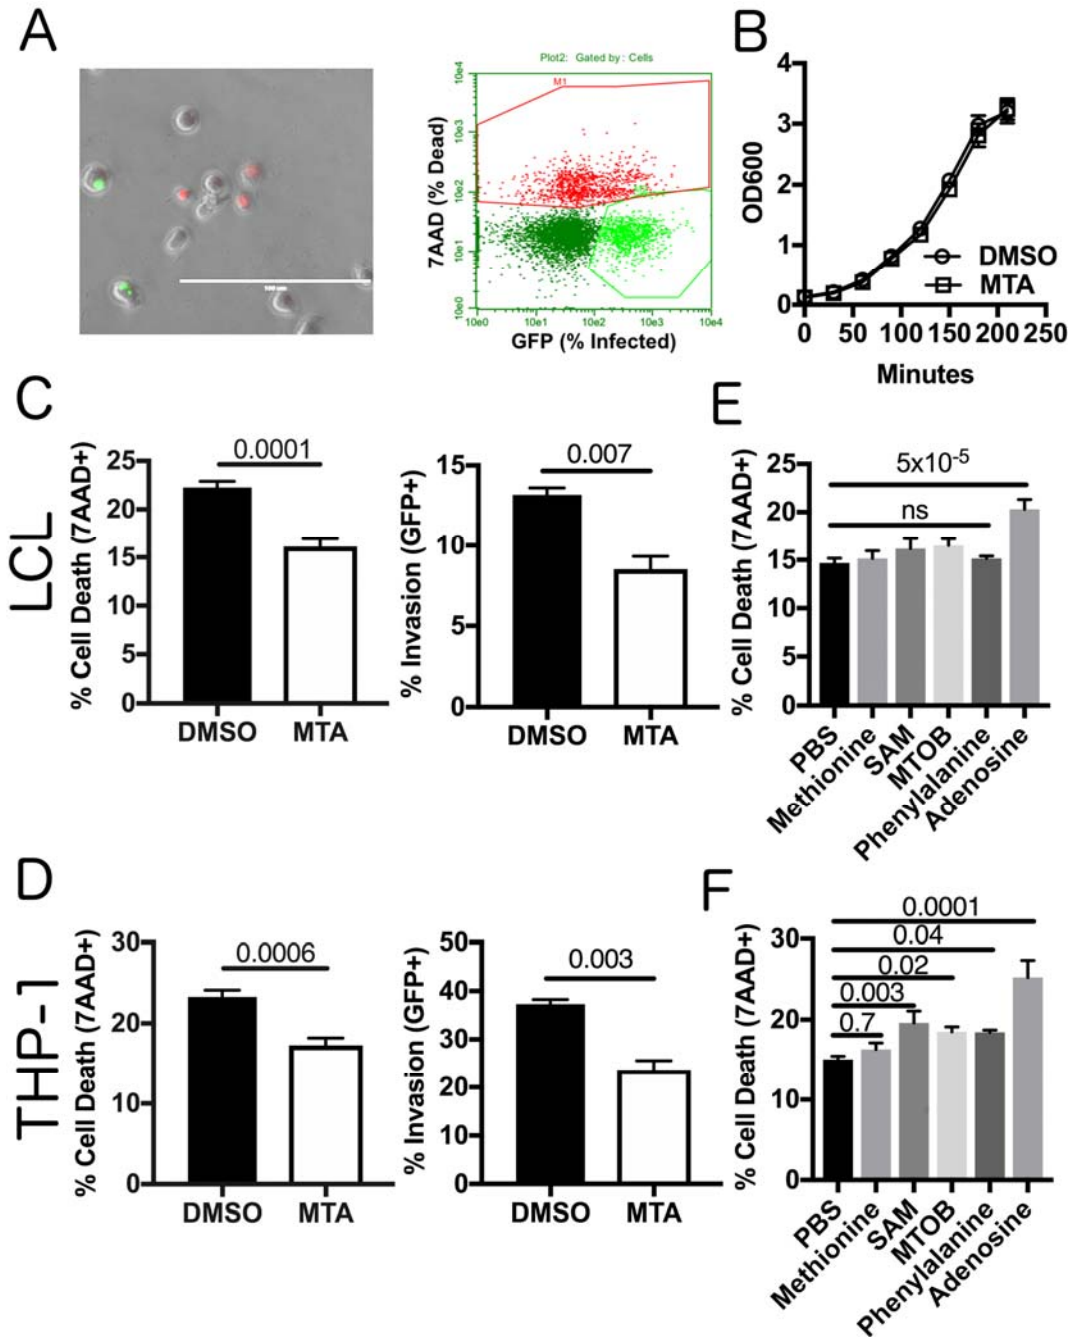

445 **Figure 1: MTA treatment of *S. Typhimurium* reduces pyroptosis and invasion *in vitro*.** (A)

Modified gentamicin protection assay using an inducible GFP plasmid was used to detect pyroptosis (7AAD+ red nuclear staining) and host cell invasion (intracellular GFP+ bacteria).

This is observable by light microscopy and quantifiable by flow cytometry. Scale bar represents

100µm. (B) Exogenous MTA has no effect on growth of *S. Typhimurium* in rich media. OD600

450 for *S. Typhimurium* treated with 300  $\mu$ M MTA or 0.5% DMSO were measured every 30 minutes  
and exhibited equivalent growth (n=3). (C-D) Treatment of bacteria with 300  $\mu$ M MTA during  
growth to late log phase (two hours and forty minutes) reduced pyroptosis (MOI 30) and host  
cell invasion (MOI 10) in LCLs measured three hours post infection in LCL 18592 (C) and THP-  
1 cells (D). Percent cell death represents all 7AAD+ cells in each infected condition, with  
455 baseline uninfected cell death subtracted. See gating in Fig 1A. Data were normalized to the  
global mean across five experiments and p-values were generated by a student's t-test. (E, F)  
Treating bacteria with other methionine related metabolites (methionine, SAM, MTOB, and  
phenylalanine) or adenosine does not suppress host cell pyroptosis (MOI 30), based on 3-5  
independent experiments in LCL 18592 (E) or THP-1 cells (F). Data were normalized to the  
460 global mean and p-values were generated by a one-way ANOVA with Dunnett's multiple  
comparisons test. All error bars represent the standard error of the mean.

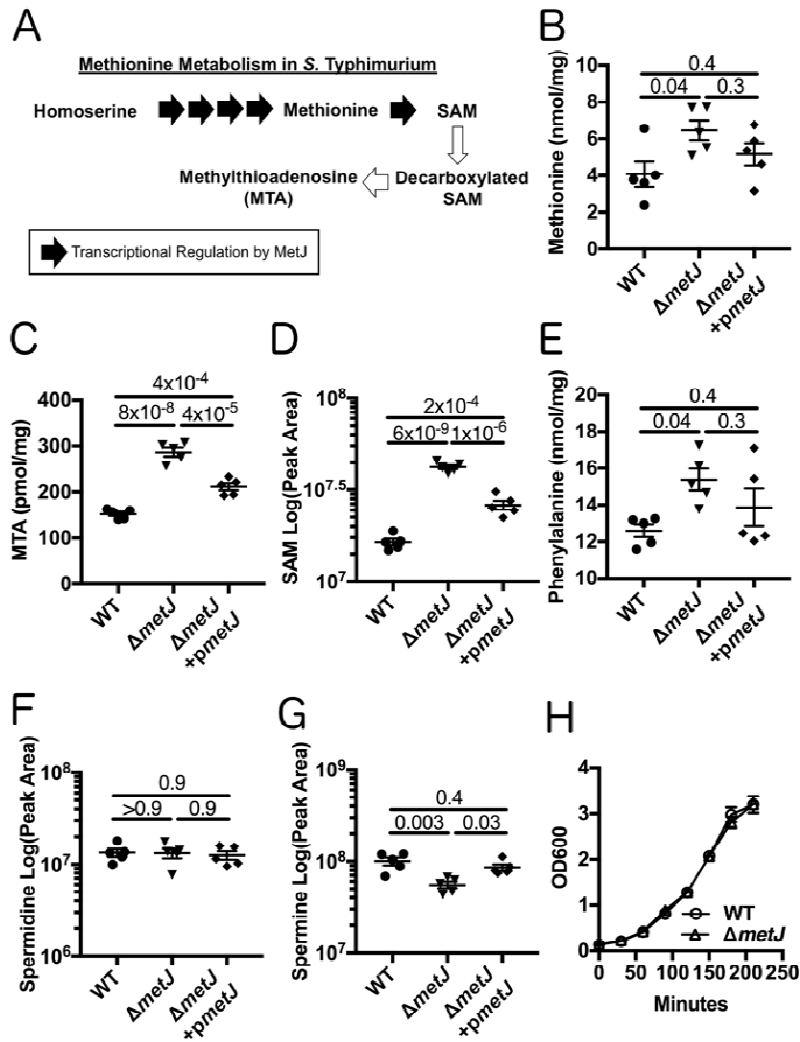

465 **Figure 2: *metJ* deletion results in disruption of methionine metabolism.**

(A) MetJ regulates the generation of methionine and SAM in *S. Typhimurium* by transcriptionally repressing the methionine regulon. Black arrows represent enzymes transcriptionally repressed by MetJ. Deletion of *metJ* leads to increased methionine (B), MTA (C), SAM (D), phenylalanine (E), as measured by mass spectrometry (n=5 biological replicates).

470 *metJ* deletion did not affect spermidine concentrations (F), but did result in decreased spermine (G). P-values were generated through a one-way ANOVA with Tukey's multiple comparisons test. (H) *metJ* deletion did not affect bacterial growth in LB (n=3 biological replicates, grown in LB+0.5% DMSO). All error bars represent the standard error of the mean.

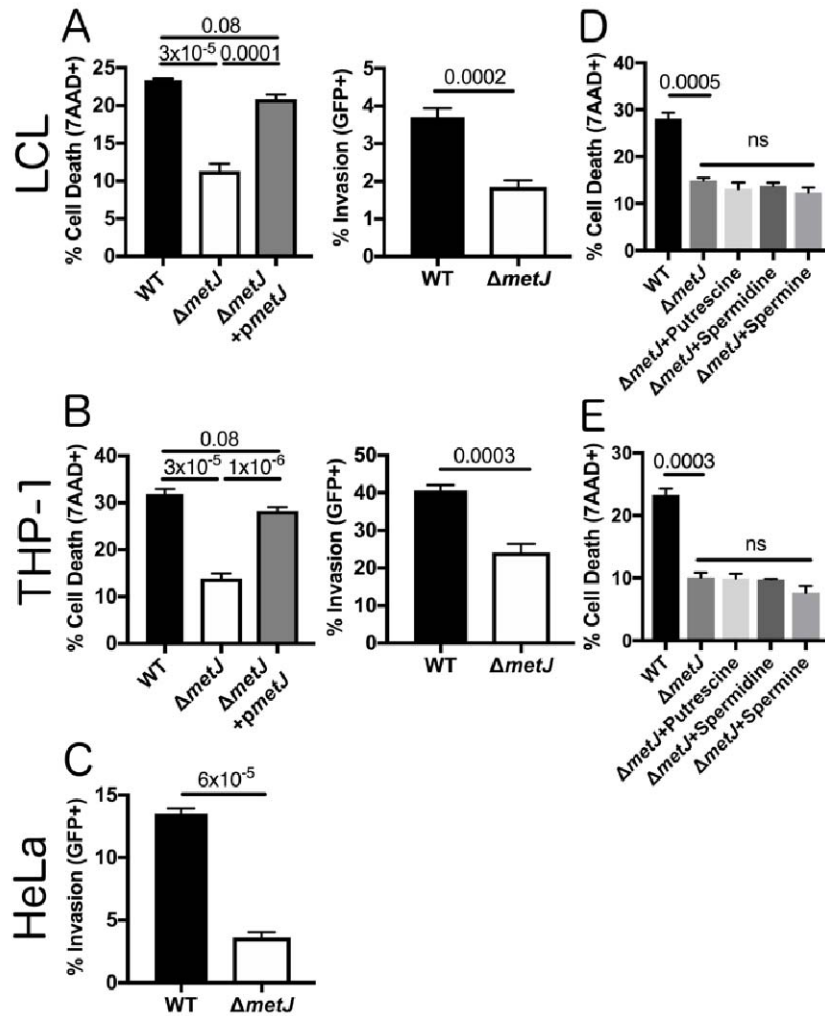

475 **Figure 3: *metJ* deletion reduces pyroptosis and invasion in vitro.**

(A) Deletion of *metJ* reduces pyroptosis and invasion of 18592 LCLs. (B) Deletion of *metJ* reduces pyroptosis and invasion of THP-1 monocytes. (C) Deletion of *metJ* reduces invasion of HeLa cells. For A, B, and C, pyroptosis and invasion were measured three hours post infection using a modified gentamicin protection assay across at least three independent experiments.

480 Percent cell death represents all 7AAD+ cells in each infected condition, with baseline uninfected cell death subtracted. See gating in Fig 1A. Data were normalized to the global mean, and p-values were calculated either through a one-way ANOVA with Tukey's multiple comparisons test or by a student's t-test. (D, E) Suppression of pyroptosis could not be rescued



by treating bacteria with polyamines. Bacteria were treated with 300 $\mu$ M of putrescine, spermidine, or spermine two hours and forty minutes prior to infection to determine whether the effects on pyroptosis were due to effects on polyamine synthesis. For all experiments with 18592 LCLs or THP-1s, cells were infected at MOI 30. HeLas were infected at MOI 5. For D and E, data were generated from two independent experiments normalized to the global mean, and p-values were generated by a one-way ANOVA with Dunnett's multiple comparisons test. Error bars represent the standard error of the mean.

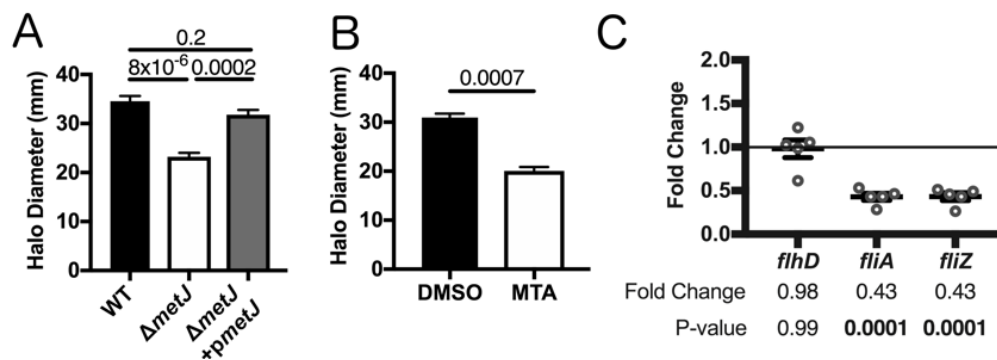

**Figure 4: *metJ* deletion and MTA treatment of *S. Typhimurium* reduces motility.**

(A) *S. Typhimurium* motility is suppressed in  $\Delta metJ$  mutants. Motility was measured after six hours at 37 $^{\circ}$ C on 0.3% LB agar. (B) Exogenous MTA suppresses *S. Typhimurium* motility. Motility was measured after six hours on 0.3% LB agar with 0.5% DMSO or 300 $\mu$ M MTA. Data from B and C represent at least three independent experiments normalized to the global mean, and p-values were calculated by a one-way ANOVA with Tukey's multiple comparisons test or a student's t-test. (C) Flagellar genes are suppressed in  $\Delta metJ$ . RNA was extracted from wild-type *S. Typhimurium* or  $\Delta metJ$  mutant bacterial cultures grown to late log phase in LB broth (n=5) and analyzed by qPCR with the ribosomal *rrs* gene serving as the endogenous control. Each dot represents an independent biological replicate. P-values were calculated by a one-way ANOVA with Dunnett's multiple comparisons test.

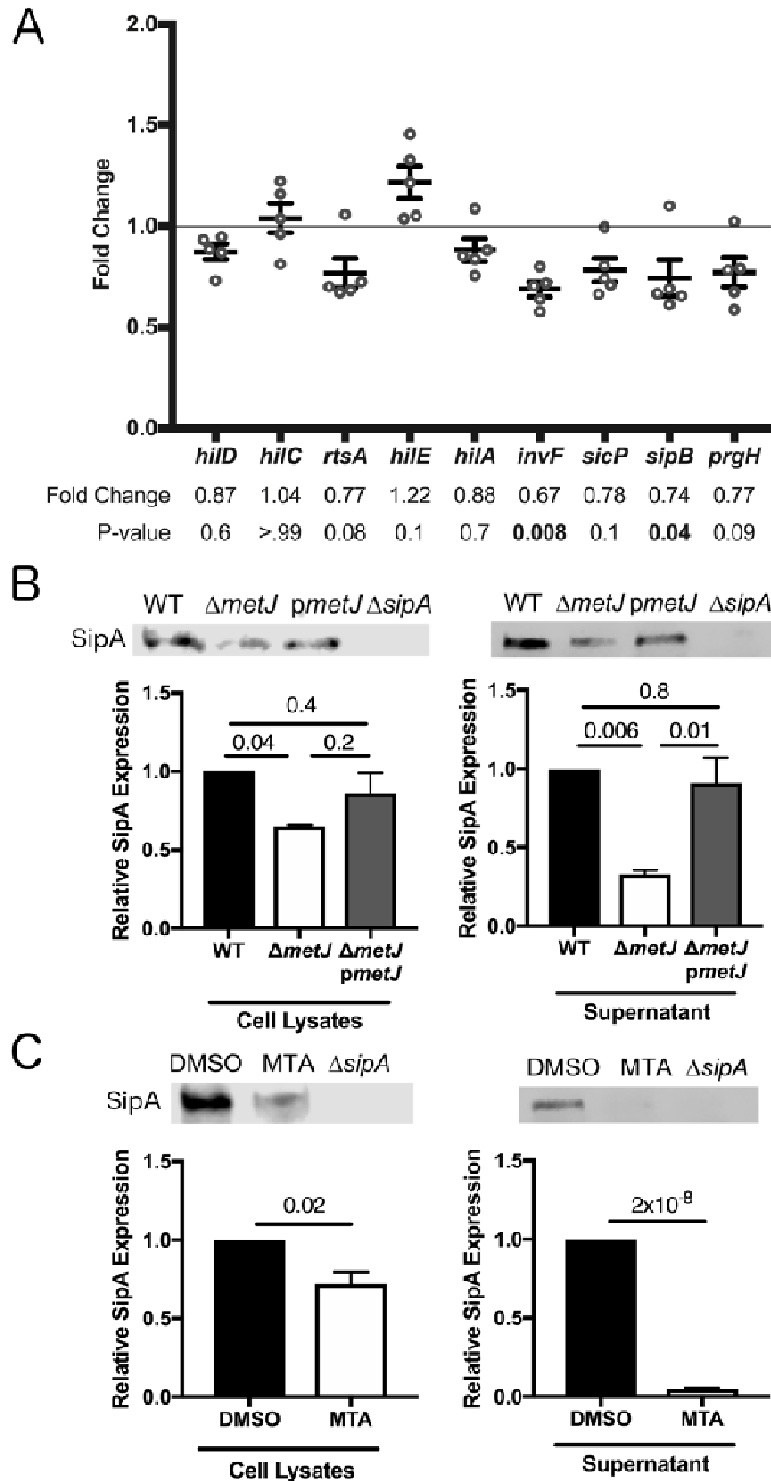

**Figure 5: *metJ* deletion and MTA treatment of *S. Typhimurium* reduces SPI-1 secretion.**

505 (A) SPI-1 genes are suppressed in  $\Delta metJ$  mutants. RNA was extracted from wild-type *S.*  
*Typhimurium* or  $\Delta metJ$  mutant bacterial cultures grown to late log phase in LB broth (n=5) and

analyzed by qPCR with the ribosomal *rrs* gene serving as the endogenous control. Each dot represents an independent biological replicate. P-values were calculated by a one-way ANOVA with Dunnett's multiple comparisons test. (B) SipA secretion is suppressed in  $\Delta metJ$  mutants.

510 SipA protein was measured by western blotting cell lysates or cell free supernatants collected at late log phase growth. (C) SipA secretion is suppressed in *S. Typhimurium* treated with exogenous MTA. SipA protein was measured by western blotting cell lysates or cell free supernatants collected at late log phase growth from bacteria grown either in 0.5% DMSO or 300 $\mu$ M MTA. For E and F, cell lysates were normalized by total protein content. Cell free

515 supernatants were spiked with 100ng/ $\mu$ L of BSA as a loading control, concentrated by TCA acid precipitation, and normalized by volume and total protein. Data represent three independent experiments and are normalized to wild-type expression. P-values were calculated by a one-way ANOVA with Tukey's multiple comparisons test or a student's t-test. All error bars represent the standard error of the mean.

520

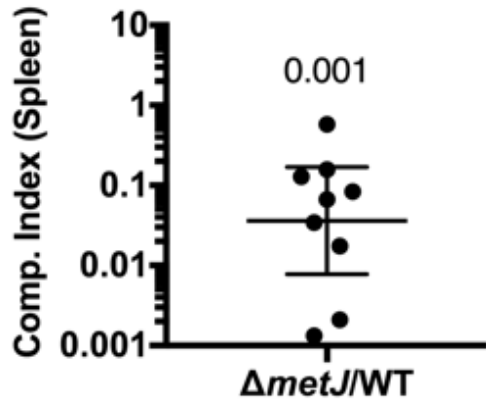

**Figure 6: *metJ* deletion suppresses *S. Typhimurium* virulence *in vivo*.**

*metJ* deletion reduced bacterial fitness in oral models of infection. C57BL/6J mice were infected with  $10^6$  total *S. Typhimurium* from a 1:1 mixture of wildtype and  $\Delta metJ$  bacteria by oral gavage. Spleens were harvested five days post infection and bacteria quantified to calculate the competitive index. Competitive index from each mouse is graphed as ( $\Delta metJ$  CFUs/WT CFUs)/( $\Delta metJ$  CFUs in inoculum/WT CFUs in inoculum). P-value was calculated by log transforming these ratios and comparing to an expected value of 0 using a one-sample t-test. Data are from three independent experiments, and are graphed using the geometric mean and 95% confidence interval.

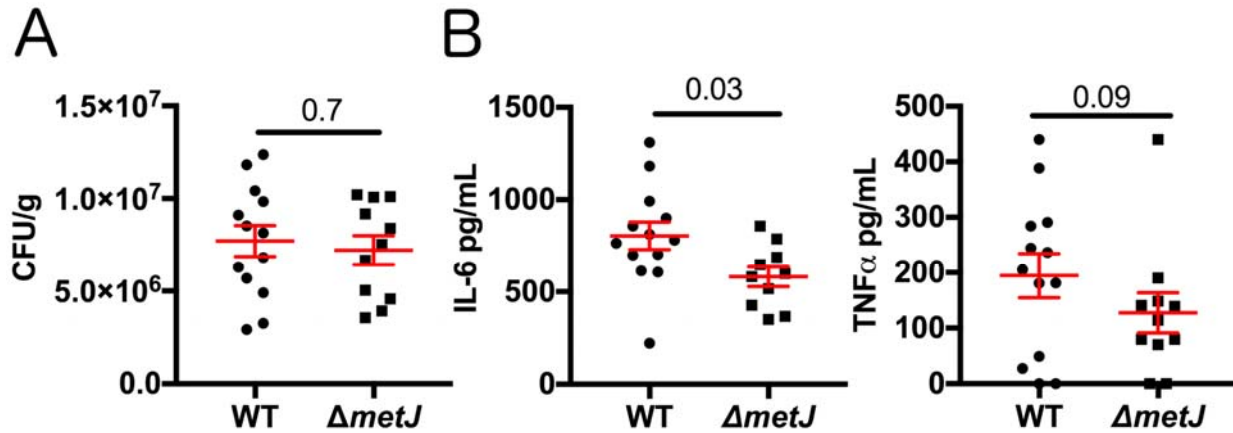

**Figure 7: Bacterial methionine metabolism reduces host inflammation.**

(A) *metJ* deletion reduced bacterial fitness at four hours post intraperitoneal infection. C57BL/6J mice were infected with  $10^6$  wild-type or  $\Delta metJ$  *S. Typhimurium*. Four hours post infection spleens were harvested and CFUs quantified. Data are graphed using the geometric mean and the 95% confidence interval. (B) *metJ* deletion reduced the host cytokine response to *S. Typhimurium* infection. Plasma harvested four hours post infection showed reduced sepsis-associated cytokines, IL-6 and TNF $\alpha$ . Data were generated by ELISA. Error bars represent the standard error of the mean. All data represent three independent experiments normalized to the global mean, with each dot representing a biological replicate. P-values for CFUs and IL-6 were calculated by an unpaired t-test with Welch's correction. Because the TNF $\alpha$  data are non-normal, a Kolmogorov-Smirnov test was used to calculate the p-value.

545

## Tables

| <b>Bacterial Strains</b> |                                   |                      |                   |
|--------------------------|-----------------------------------|----------------------|-------------------|
| <b>Strain</b>            | <b>Genotype</b>                   | <b>Plasmid</b>       | <b>Resistance</b> |
| DCK543                   | NCTC 12023 (ATCC 14028)           |                      |                   |
| DCK545                   | $\Delta metJ$                     |                      |                   |
| DCK546                   | NCTC 12023 (ATCC 14028)           | pWSK29               | Amp               |
| DCK547                   | $\Delta metJ$                     | pWSK29               | Amp               |
| DCK548                   | $\Delta metJ$                     | pWSK29:: <i>metJ</i> | Amp               |
| DCK571                   | NCTC 12023 (ATCC 14028)           | <i>p67GFP</i>        | Amp               |
| DCK573                   | $\Delta metJ$                     | <i>p67GFP</i>        | Amp               |
| DCK574                   | NCTC 12023 (ATCC 14028)           | pWSK129              | Kan               |
| DCK576                   | $\Delta metJ$                     | pWSK129              | Kan               |
| DCK88                    | <i>sspA::Tn5 (sipA insertion)</i> |                      | Tet               |

Table 1: Bacterial strains used in this study

| <b>qPCR Primers</b> |                  |                              |               |
|---------------------|------------------|------------------------------|---------------|
| <b>Gene</b>         | <b>Direction</b> | <b>Sequence</b>              | <b>Source</b> |
| <i>hila</i>         | Fwd              | ATAGCAAACCTCCCGACGATG        | (78)          |
|                     | Rev              | ATTAAGGCGACAGAGCTGG          |               |
| <i>hilD</i>         | Fwd              | GGTAGTTAACGTGACGCTTG         | (78)          |
|                     | Rev              | GATCTTCTGCGCTTTCTCTG         |               |
| <i>rtsA</i>         | Fwd              | ACCCGTGGTGAGCTTGATGAGT       | (78)          |
|                     | Rev              | CCTGTCCAGGTGGGGAGCAT         |               |
| <i>sicP</i>         | Fwd              | AGATGATATCTGGTTATTGAACGGTATG | (78)          |
|                     | Rev              | CTGCCGCCAGATAGAATCG          |               |
| <i>hilC</i>         | Fwd              | CTCACCTCTTCAGCGGCCAGT        | (78)          |
|                     | Rev              | CACCCGCAAATGGTCACAGGCT       |               |
| <i>prgH</i>         | Fwd              | TGAACGGCTGTGAGTTTCCA         | (78)          |
|                     | Rev              | GCGCATCACTCTGACCTACCA        |               |
| <i>sipB</i>         | Fwd              | GGCGCGCTGCTAACCAT            | (78)          |
|                     | Rev              | TCGCCCCACCGGTAAAA            |               |
| <i>invF</i>         | Fwd              | TGTCGCACCAGTATCAGGAG         | (79)          |
|                     | Rev              | AAATAGCGCGAAACTCAGGA         |               |

|                           |                            |                                                                           |      |
|---------------------------|----------------------------|---------------------------------------------------------------------------|------|
| <i>hilE</i>               | Fwd                        | AAAGCCGGATCAAAGGTTTT                                                      | (79) |
|                           | Rev                        | CTTTCACCGTTTTCCCGTTA                                                      |      |
| <i>flhD</i>               | Fwd                        | TGTTCCGCCTCGGTATCAAC                                                      | (80) |
|                           | Rev                        | CGCGAATCCTGAGTCAAACG                                                      |      |
| <i>fliA</i>               | Fwd                        | GATTGAATCGCTGCCGGAAC                                                      | (80) |
|                           | Rev                        | ACTATGCAACTGGCTGACCC                                                      |      |
| <i>fliZ</i>               | Fwd                        | AAACATTTCCACGATCTGC                                                       | (80) |
|                           | Rev                        | CGGTAAAGGGGGATTTCTG                                                       |      |
| <i>rrs</i>                | Fwd                        | CGGGGAGGAAGGTGTTGTG                                                       | (79) |
|                           | Rev                        | CAGCCCGGGGATTTACATC                                                       |      |
| <b>Lamda-Red Deletion</b> |                            |                                                                           |      |
| <i>metJ</i>               | Fwd Cassette<br>Generation | GGGCTCAGGTCAGACCTCAATATTAATGACGAAGA<br>GGATTAAGTATCTCGTGTAGGCTGGAGCTGCTTC |      |
|                           | Rev Cassette<br>Generation | GAATCGTTAAAAAGCGCGGCCAGAGGCGTTCTGAC<br>CGCATGCTTTGCTACATATGAATATCCTCCTTAG |      |
|                           | Upstream                   | CATCTGCGACCGCTAACTT                                                       |      |
|                           | Downstream                 | TTTATCCACCGAGGGTTATTCG                                                    |      |
|                           | pKD46 Fwd                  | CAGTCATAGCCGAATAGCCT                                                      | (75) |
|                           | pKD46 Rev                  | CGGCCACAGTCGATGAATCC                                                      | (75) |

Table 2: Oligonucleotides used in this study

## References

1. Collazo CM, Galan JE. Requirement for exported proteins in secretion through the invasion-associated type III system of *Salmonella typhimurium*. *Infect Immun*. 1996;64(9):3524-31. 555
2. Galan JE, Curtiss R, 3rd. Cloning and molecular characterization of genes whose products allow *Salmonella typhimurium* to penetrate tissue culture cells. *Proc Natl Acad Sci U S A*. 1989;86(16):6383-7.
3. Behlau I, Miller SI. A PhoP-repressed gene promotes *Salmonella typhimurium* invasion of epithelial cells. *Journal of bacteriology*. 1993;175(14):4475-84. 560
4. Hung CC, Garner CD, Slauch JM, Dwyer ZW, Lawhon SD, Frye JG, et al. The intestinal fatty acid propionate inhibits *Salmonella* invasion through the post-translational control of HilD. *Molecular microbiology*. 2013;87(5):1045-60.
5. Bajaj V, Lucas RL, Hwang C, Lee CA. Co-ordinate regulation of *Salmonella typhimurium* invasion genes by environmental and regulatory factors is mediated by control of hilA expression. *Molecular microbiology*. 1996;22(4):703-14. 565
6. Lawhon SD, Maurer R, Suyemoto M, Altier C. Intestinal short-chain fatty acids alter *Salmonella typhimurium* invasion gene expression and virulence through BarA/SirA. *Molecular microbiology*. 2002;46(5):1451-64.
7. Prouty AM, Gunn JS. *Salmonella enterica* serovar typhimurium invasion is repressed in the presence of bile. *Infect Immun*. 2000;68(12):6763-9. 570
8. Jones BD, Gori N, Falkow S. *Salmonella typhimurium* initiates murine infection by penetrating and destroying the specialized epithelial M cells of the Peyer's patches. *J Exp Med*. 1994;180(1):15-23.
9. Ismail AS, Valastyan JS, Bassler BL. A Host-Produced Autoinducer-2 Mimic Activates Bacterial Quorum Sensing. *Cell Host Microbe*. 2016;19(4):470-80. 575
10. Hondorp ER, Matthews RG. Methionine. *EcoSal Plus*. 2006;2(1).
11. Parveen N, Cornell KA. Methylthioadenosine/S-adenosylhomocysteine nucleosidase, a critical enzyme for bacterial metabolism. *Mol Microbiol*. 2011;79(1):7-20.
12. Davis BME. Mutants of *Escherichia coli* Requiring Methionine or Vitamin B12. *Journal of bacteriology*. 1950;60(1):17-28. 580
13. Schroeder HR, Barnes CJ, Bohinski RC, Mumma RO, Mallette MF. Isolation and identification of 5-methylthioribose from *Escherichia coli* B. *Biochimica et biophysica acta*. 1972;273(2):254-64.
14. Cornell KA, Riscoe MK. Cloning and expression of *Escherichia coli* 5'-methylthioadenosine/S-adenosylhomocysteine nucleosidase: identification of the pfs gene product. *Biochimica et biophysica acta*. 1998;1396(1):8-14. 585
15. Cadieux N, Bradbeer C, Reeger-Schneider E, Koster W, Mohanty AK, Wiener MC, et al. Identification of the periplasmic cobalamin-binding protein BtuF of *Escherichia coli*. *Journal of bacteriology*. 2002;184(3):706-17. 590
16. Ko DC, Gamazon ER, Shukla KP, Pfuetzner RA, Whittington D, Holden TD, et al. Functional genetic screen of human diversity reveals that a methionine salvage enzyme regulates inflammatory cell death. *Proc Natl Acad Sci U S A*. 2012;109(35):E2343-52.



- 595 17. Wang L, Ko ER, Gilchrist JJ, Pittman KJ, Rautanen A, Pirinen M, et al. Human genetic and metabolite variation reveal methylthioadenosine is a prognostic biomarker and inflammatory regulator in sepsis. *Science Advances*. 2017;3:e1602096.
18. Benight NM, Stoll B, Marini JC, Burrin DG. Preventative oral methylthioadenosine is anti-inflammatory and reduces DSS-induced colitis in mice. *American journal of physiology Gastrointestinal and liver physiology*. 2012;303(1):G71-82.
- 600 19. Hevia H, Varela-Rey M, Corrales FJ, Berasain C, Martinez-Chantar ML, Latasa MU, et al. 5'-methylthioadenosine modulates the inflammatory response to endotoxin in mice and in rat hepatocytes. *Hepatology*. 2004;39(4):1088-98.
20. Keyel PA, Romero M, Wu W, Kwak DH, Zhu Q, Liu X, et al. Methylthioadenosine reprograms macrophage activation through adenosine receptor stimulation. *PLoS One*. 605 2014;9(8):e104210.
21. Castro-Eguiluz D, Pelayo R, Rosales-Garcia V, Rosales-Reyes R, Alpuche-Aranda C, Ortiz-Navarrete V. B cell precursors are targets for *Salmonella* infection. *Microb Pathog*. 2009;47(1):52-6.
22. Rosales-Reyes R, Alpuche-Aranda C, Ramirez-Aguilar Mde L, Castro-Eguiluz AD, 610 Ortiz-Navarrete V. Survival of *Salmonella enterica* serovar Typhimurium within late endosomal-lysosomal compartments of B lymphocytes is associated with the inability to use the vacuolar alternative major histocompatibility complex class I antigen-processing pathway. *Infect Immun*. 2005;73(7):3937-44.
23. Rosales-Reyes R, Perez-Lopez A, Sanchez-Gomez C, Hernandez-Mote RR, Castro- 615 Eguiluz D, Ortiz-Navarrete V, et al. *Salmonella* infects B cells by macropinocytosis and formation of spacious phagosomes but does not induce pyroptosis in favor of its survival. *Microb Pathog*. 2012;52(6):367-74.
24. Alvarez MI, Glover LC, Luo P, Wang L, Theusch E, Oehlers SH, et al. Human genetic 620 variation in VAC14 regulates *Salmonella* invasion and typhoid fever through modulation of cholesterol. *Proc Natl Acad Sci U S A*. 2017;114(37):E7746-E55.
25. Armstrong JB. Chemotaxis and methionine metabolism in *Escherichia coli*. *Can J Microbiol*. 1972;18(5):591-6.
26. Aswad DW, Koshland DE, Jr. Evidence for an S-adenosylmethionine requirement in the 625 chemotactic behavior of *Salmonella typhimurium*. *J Mol Biol*. 1975;97(2):207-23.
27. Lawrence DA, Smith DA, Rowbury RJ. Regulation of methionine synthesis in *Salmonella typhimurium*: mutants resistant to inhibition by analogues of methionine. *Genetics*. 1968;58(4):473-92.
28. Khoramian-Falsafi T, Harayama S, Kutsukake K, Pechere JC. Effect of motility and 630 chemotaxis on the invasion of *Salmonella typhimurium* into HeLa cells. *Microb Pathog*. 1990;9(1):47-53.
29. Misselwitz B, Barrett N, Kreibich S, Vonaesch P, Andritschke D, Rout S, et al. Near surface swimming of *Salmonella Typhimurium* explains target-site selection and cooperative invasion. *PLoS Pathog*. 2012;8(7):e1002810.
30. Chen LM, Kaniga K, Galan JE. *Salmonella* spp. are cytotoxic for cultured macrophages. 635 *Molecular microbiology*. 1996;21(5):1101-15.
31. Lundberg U, Vinatzer U, Berdnik D, von Gabain A, Baccarini M. Growth phase-regulated induction of *Salmonella*-induced macrophage apoptosis correlates with transient expression of SPI-1 genes. *Journal of bacteriology*. 1999;181(11):3433-7.

32. Monack DM, Raupach B, Hromockyj AE, Falkow S. Salmonella typhimurium invasion induces apoptosis in infected macrophages. *Proc Natl Acad Sci U S A*. 1996;93(18):9833-8.
- 640 33. Hersh D, Monack DM, Smith MR, Ghori N, Falkow S, Zychlinsky A. The Salmonella invasin SipB induces macrophage apoptosis by binding to caspase-1. *Proc Natl Acad Sci U S A*. 1999;96(5):2396-401.
34. Yang J, Zhao Y, Shi J, Shao F. Human NAIP and mouse NAIP1 recognize bacterial type III secretion needle protein for inflammasome activation. *Proc Natl Acad Sci U S A*. 2013;110(35):14408-13.
- 645 35. Wang L, Cai X, Wu S, Bomjan R, Nakayasu ES, Handler K, et al. InvS Coordinates Expression of PrgH and FimZ and Is Required for Invasion of Epithelial Cells by Salmonella enterica serovar Typhimurium. *Journal of bacteriology*. 2017;199(13).
- 650 36. Ellermeier CD, Ellermeier JR, Slauch JM. HilD, HilC and RtsA constitute a feed forward loop that controls expression of the SPII type three secretion system regulator hilA in Salmonella enterica serovar Typhimurium. *Molecular microbiology*. 2005;57(3):691-705.
37. Saini S, Ellermeier JR, Slauch JM, Rao CV. The role of coupled positive feedback in the expression of the SPII type three secretion system in Salmonella. *PLoS Pathog*. 2010;6(7):e1001025.
- 655 38. Bajaj V, Hwang C, Lee CA. hilA is a novel ompR/toxR family member that activates the expression of Salmonella typhimurium invasion genes. *Molecular microbiology*. 1995;18(4):715-27.
39. Eichelberg K, Galan JE. Differential regulation of Salmonella typhimurium type III secreted proteins by pathogenicity island 1 (SPI-1)-encoded transcriptional activators InvF and hilA. *Infect Immun*. 1999;67(8):4099-105.
- 660 40. Lostroh CP, Lee CA. The HilA box and sequences outside it determine the magnitude of HilA-dependent activation of P(prgH) from Salmonella pathogenicity island 1. *Journal of bacteriology*. 2001;183(16):4876-85.
- 665 41. Akbar S, Schechter LM, Lostroh CP, Lee CA. AraC/XylS family members, HilD and HilC, directly activate virulence gene expression independently of HilA in Salmonella typhimurium. *Molecular microbiology*. 2003;47(3):715-28.
42. Darwin KH, Miller VL. InvF is required for expression of genes encoding proteins secreted by the SPII type III secretion apparatus in Salmonella typhimurium. *Journal of bacteriology*. 1999;181(16):4949-54.
- 670 43. Darwin KH, Miller VL. Type III secretion chaperone-dependent regulation: activation of virulence genes by SicA and InvF in Salmonella typhimurium. *EMBO J*. 2001;20(8):1850-62.
44. Stecher B, Robbiani R, Walker AW, Westendorf AM, Barthel M, Kremer M, et al. Salmonella enterica serovar typhimurium exploits inflammation to compete with the intestinal microbiota. *PLoS Biol*. 2007;5(10):2177-89.
- 675 45. Kaiser P, Slack E, Grant AJ, Hardt WD, Regoes RR. Lymph node colonization dynamics after oral Salmonella Typhimurium infection in mice. *PLoS Pathog*. 2013;9(9):e1003532.
46. Thiennimitr P, Winter SE, Winter MG, Xavier MN, Tolstikov V, Huseby DL, et al. Intestinal inflammation allows Salmonella to use ethanolamine to compete with the microbiota. *Proc Natl Acad Sci U S A*. 2011;108(42):17480-5.
- 680 47. Franchi L, Amer A, Body-Malapel M, Kanneganti TD, Ozoren N, Jagirdar R, et al. Cytosolic flagellin requires Ipaf for activation of caspase-1 and interleukin 1beta in salmonella-infected macrophages. *Nat Immunol*. 2006;7(6):576-82.

48. Miao EA, Alpuche-Aranda CM, Dors M, Clark AE, Bader MW, Miller SI, et al. 685  
Cytoplasmic flagellin activates caspase-1 and secretion of interleukin 1beta via Ipaf. *Nat Immunol.* 2006;7(6):569-75.
49. Rayamajhi M, Zak DE, Chavarria-Smith J, Vance RE, Miao EA. Cutting edge: Mouse  
NAIP1 detects the type III secretion system needle protein. *J Immunol.* 2013;191(8):3986-9.
50. Miao EA, Mao DP, Yudkovsky N, Bonneau R, Lorang CG, Warren SE, et al. 690  
Innate immune detection of the type III secretion apparatus through the NLRC4 inflammasome. *Proc Natl Acad Sci U S A.* 2010;107(7):3076-80.
51. Lopez-Garrido J, Puerta-Fernandez E, Cota I, Casadesus J. Virulence Gene Regulation by  
L-Arabinose in *Salmonella enterica*. *Genetics.* 2015;200(3):807-19.
52. Moreira CG, Weinshenker D, Sperandio V. QseC mediates *Salmonella enterica* serovar  
695 typhimurium virulence in vitro and in vivo. *Infect Immun.* 2010;78(3):914-26.
53. Bogard RW, Davies BW, Mekalanos JJ. MetR-regulated *Vibrio cholerae* metabolism is  
required for virulence. *MBio.* 2012;3(5).
54. Cubitt MF, Hedley PE, Williamson NR, Morris JA, Campbell E, Toth IK, et al. A  
metabolic regulator modulates virulence and quorum sensing signal production in  
700 *Pectobacterium atrosepticum*. *Mol Plant Microbe Interact.* 2013;26(3):356-66.
55. Bauerle MR, Schwalm EL, Booker SJ. Mechanistic diversity of radical S-  
adenosylmethionine (SAM)-dependent methylation. *J Biol Chem.* 2015;290(7):3995-4002.
56. Golovina AY, Dzama MM, Osterman IA, Sergiev PV, Serebryakova MV, Bogdanov AA,  
et al. The last rRNA methyltransferase of *E. coli* revealed: the yhiR gene encodes adenine-N6  
705 methyltransferase specific for modification of A2030 of 23S ribosomal RNA. *Rna.*  
2012;18(9):1725-34.
57. Sergiev PV, Serebryakova MV, Bogdanov AA, Dontsova OA. The ybiN gene of  
*Escherichia coli* encodes adenine-N6 methyltransferase specific for modification of A1618 of 23  
S ribosomal RNA, a methylated residue located close to the ribosomal exit tunnel. *J Mol Biol.*  
710 2008;375(1):291-300.
58. Chu Y, Zhang Z, Wang Q, Luo Y, Huang L. Identification and characterization of a  
highly conserved crenarchaeal protein lysine methyltransferase with broad substrate specificity.  
*Journal of bacteriology.* 2012;194(24):6917-26.
59. Lachner M, Jenuwein T. The many faces of histone lysine methylation. *Current opinion*  
715 *in cell biology.* 2002;14(3):286-98.
60. Sanchez-Romero MA, Cota I, Casadesus J. DNA methylation in bacteria: from the  
methyl group to the methylome. *Curr Opin Microbiol.* 2015;25:9-16.
61. Bigaud E, Corrales FJ. Methylthioadenosine (MTA) Regulates Liver Cells Proteome and  
Methylproteome: Implications in Liver Biology and Disease. *Mol Cell Proteomics.*  
720 2016;15(5):1498-510.
62. Mentch SJ, Mehrmohamadi M, Huang L, Liu X, Gupta D, Mattocks D, et al. Histone  
Methylation Dynamics and Gene Regulation Occur through the Sensing of One-Carbon  
Metabolism. *Cell metabolism.* 2015;22(5):861-73.
63. Pascale RM, Simile MM, Satta G, Seddaiu MA, Daino L, Pinna G, et al. Comparative  
725 effects of L-methionine, S-adenosyl-L-methionine and 5'-methylthioadenosine on the growth of  
preneoplastic lesions and DNA methylation in rat liver during the early stages of  
hepatocarcinogenesis. *Anticancer Res.* 1991;11(4):1617-24.

64. Pendleton KE, Chen B, Liu K, Hunter OV, Xie Y, Tu BP, et al. The U6 snRNA m(6)A Methyltransferase METTL16 Regulates SAM Synthetase Intron Retention. *Cell*. 2017;169(5):824-35 e14.  
730
65. Sturm A, Heinemann M, Arnoldini M, Benecke A, Ackermann M, Benz M, et al. The cost of virulence: retarded growth of *Salmonella Typhimurium* cells expressing type III secretion system 1. *PLoS Pathog*. 2011;7(7):e1002143.
66. Li X, Chu S, Feher VA, Khalili M, Nie Z, Margosiak S, et al. Structure-based design, synthesis, and antimicrobial activity of indazole-derived SAH/MTA nucleosidase inhibitors. *J Med Chem*. 2003;46(26):5663-73.  
735
67. Tedder ME, Nie Z, Margosiak S, Chu S, Feher VA, Almassy R, et al. Structure-based design, synthesis, and antimicrobial activity of purine derived SAH/MTA nucleosidase inhibitors. *Bioorg Med Chem Lett*. 2004;14(12):3165-8.
68. Longshaw AI, Adanitsch F, Gutierrez JA, Evans GB, Tyler PC, Schramm VL. Design and synthesis of potent "sulfur-free" transition state analogue inhibitors of 5'-methylthioadenosine nucleosidase and 5'-methylthioadenosine phosphorylase. *J Med Chem*. 2010;53(18):6730-46.  
740
69. Gutierrez JA, Crowder T, Rinaldo-Matthis A, Ho MC, Almo SC, Schramm VL. Transition state analogs of 5'-methylthioadenosine nucleosidase disrupt quorum sensing. *Nat Chem Biol*. 2009;5(4):251-7.  
745
70. Schramm VL, Gutierrez JA, Cordovano G, Basu I, Guha C, Belbin TJ, et al. Transition state analogues in quorum sensing and SAM recycling. *Nucleic Acids Symp Ser (Oxf)*. 2008(52):75-6.
71. Kamath VP, Ananth S, Bantia S, Morris PE, Jr. Synthesis of a potent transition-state inhibitor of 5'-deoxy-5'-methylthioadenosine phosphorylase. *J Med Chem*. 2004;47(6):1322-4.  
750
72. Evans GB, Furneaux RH, Lenz DH, Painter GF, Schramm VL, Singh V, et al. Second generation transition state analogue inhibitors of human 5'-methylthioadenosine phosphorylase. *J Med Chem*. 2005;48(14):4679-89.
73. Singh V, Shi W, Evans GB, Tyler PC, Furneaux RH, Almo SC, et al. Picomolar transition state analogue inhibitors of human 5'-methylthioadenosine phosphorylase and X-ray structure with MT-immucillin-A. *Biochemistry*. 2004;43(1):9-18.  
755
74. Basu I, Locker J, Cassera MB, Belbin TJ, Merino EF, Dong X, et al. Growth and metastases of human lung cancer are inhibited in mouse xenografts by a transition state analogue of 5'-methylthioadenosine phosphorylase. *J Biol Chem*. 2011;286(6):4902-11.  
760
75. Datsenko KA, Wanner BL. One-step inactivation of chromosomal genes in *Escherichia coli* K-12 using PCR products. *Proc Natl Acad Sci U S A*. 2000;97(12):6640-5.
76. Cherepanov PP, Wackernagel W. Gene disruption in *Escherichia coli*: TcR and KmR cassettes with the option of Flp-catalyzed excision of the antibiotic-resistance determinant. *Gene*. 1995;158(1):9-14.  
765
77. Schindelin J, Arganda-Carreras I, Frise E, Kaynig V, Longair M, Pietzsch T, et al. Fiji: an open-source platform for biological-image analysis. *Nature methods*. 2012;9(7):676-82.
78. Abernathy J, Corkill C, Hinojosa C, Li X, Zhou H. Deletions in the pyruvate pathway of *Salmonella Typhimurium* alter SPI1-mediated gene expression and infectivity. *J Anim Sci Biotechnol*. 2013;4(1):5.  
770
79. Lim S, Yun J, Yoon H, Park C, Kim B, Jeon B, et al. Mlc regulation of *Salmonella* pathogenicity island I gene expression via h1E repression. *Nucleic acids research*. 2007;35(6):1822-32.

- 775 80. Elhadad D, Desai P, Rahav G, McClelland M, Gal-Mor O. Flagellin Is Required for Host Cell Invasion and Normal Salmonella Pathogenicity Island 1 Expression by Salmonella enterica Serovar Paratyphi A. *Infect Immun.* 2015;83(9):3355-68.
